# Supplementary material for: Knowledge Production and Learning for Sustainable Landscapes: Seven Steps Using Social–Ecological Systems as Laboratories
Source: PubMed Central journal article supplement (PMC3593032; doi:10.1007/s13280-012-0367-1), 2013-03-10
Supplement: 13280_2012_367_MOESM1_ESM.pdf [file 13280_2012_367_MOESM1_ESM.pdf]

Electronic Supplementary Material

**Knowledge production and learning for sustainable landscapes: seven steps using social-ecological systems as laboratories**

Per Angelstam, Marine Elbakidze, Robert Axelsson, Malcolm Dixelius, Johan Törnblom

## References to studies made in the nine landscape case studies listed in Table 1

### ***Ångermanälven catchment and Vilhelmina Model Forest (NW Sweden)***

- Angelstam, P., J. Törnblom, E. Degerman, L. Henrikson, L. Jougda, M. Lazdinis, J.C. Malmgren, and L. Myhrman. 2006. From forest patches to functional habitat networks – the need for holistic understanding of ecological systems at the landscape scale. In *Farming, forestry and the natural heritage: towards a more integrated future*, ed. R. Davison, and C.A. Galbraith, 193-209. The Stationery Office: The Natural Heritage of Scotland Series.
- Angelstam, P., M. Elbakidze, and J. Törnblom. 2010. Mountain rivers in northern Sweden as a natural resource - the need for an integrated landscape approach. In: *Europe's ecological backbone: recognising the true value of our mountains*, 108-109. Copenhagen: European Environmental Agency.
- Axelsson, R., and P. Angelstam. 2011. Uneven-aged forest management in boreal Sweden: local forestry stakeholders' perceptions of different sustainability dimensions. *Forestry* 84 (5): 567-579.
- Axelsson, R., P. Angelstam, and J. Svensson. 2007. Natural forest and cultural woodland with continuous tree cover in Sweden: How much remains and how is it managed? *Scandinavian Journal of Forest Research* 22: 545-558.
- Elbakidze, M., P. Angelstam, C. Sandström, and R. Axelsson. 2010. Multi-stakeholder collaboration in Russian and Swedish Model Forest initiatives: adaptive governance towards sustainable forest management? *Ecology and Society* 15(2): 14.

### ***Bergslagen region (south-central Sweden)***

- Andersson, K., P. Angelstam, R. Axelsson, M. Elbakidze, and J. Törnblom. 2012. Connecting municipal and regional level planning: analysis and visualization of sustainability indicators in Bergslagen, Sweden. *European Planning Studies*. doi: 10.1080/09654313.2012.722943.
- Andersson, K., P. Angelstam, M. Elbakidze, R. Axelsson, and E. Degerman. 2013. Green infrastructures and intensive forestry: need and opportunity for spatial planning in a Swedish rural-urban gradient. *Scandinavian Journal of Forest Research* 28(2): 143-165.
- Angelstam, P., J. Törnblom, E. Degerman, L. Henrikson, L. Jougda, M. Lazdinis, J.C. Malmgren, and L. Myhrman. 2006. From forest patches to functional habitat networks – the need for holistic understanding of ecological systems at the landscape scale. In *Farming, forestry and the natural heritage: towards a more integrated future*, ed. R. Davison, and C.A. Galbraith, 193-209. The Stationery Office: The Natural Heritage of Scotland Series.
- Angelstam, P., K. Andersson, R. Axelsson, M. Elbakidze, B.-G. Jonsson, and J.-M. Roberge. 2011. Protecting forest areas for biodiversity in Sweden 1991-2010: policy implementation process and outcomes on the ground. *Silva Fennica* 45(5): 1111–1133.
- Angelstam, P., R. Axelsson, M. Elbakidze, L. Laestadius, M. Lazdinis, M. Nordberg, I. Pătru-Stupariu, and M. Smith. 2011. Knowledge production and learning for sustainable forest management: European regions as a time machine. *Forestry* 84 (5): 581-596.
- Angelstam, P., K. Andersson, M. Isacson, D.V. Gavrillov, R. Axelsson, M. Bäckström, E. Degerman, M. Elbakidze et al. 2013. Learning about the history of landscape use for the future: consequences for ecological and social systems in Swedish Bergslagen. *AMBIO* 42(2): 146–159.
- Axelsson, R., and P. Angelstam. 2011. Uneven-aged forest management in boreal Sweden: local forestry stakeholders' perceptions of different sustainability dimensions. *Forestry* 84 (5): 567-579.

- Axelsson, R., P. Angelstam, and J. Svensson. 2007. Natural forest and cultural woodland with continuous tree cover in Sweden: How much remains and how is it managed? *Scandinavian Journal of Forest Research* 22: 545-558.
- Axelsson, R., P. Angelstam, L. Myhrman, S. Sädbom, M. Ivarsson, M. Elbakidze, K. Andersson, P. Cupa et al. 2013. Evaluation of multi-level social learning for sustainable landscapes: perspective of a development initiative in Bergslagen, Sweden. *AMBIO* 42(2): 241–253.
- Elbakidze, M., P. Angelstam, C. Sandström, and R. Axelsson. 2010. Multi-stakeholder collaboration in Russian and Swedish Model Forest initiatives: adaptive governance towards sustainable forest management? *Ecology and Society* 15(2): 14.
- Elbakidze, M., P. Angelstam, K. Andersson, M. Nordberg, and Yu. Pautov. 2011. How does forest certification contribute to boreal biodiversity conservation? Standards and outcomes in Sweden and NW Russia. *Forest Ecology and Management* 262: 1983-1995.
- Elbakidze, M., K. Andersson, P. Angelstam, G.W. Armstrong, R. Axelsson, F. Doyon, M. Hermansson, J. Jacobsson et al. 2013. Sustained yield forestry in Sweden and Russia: how does it correspond to sustainable forest management policy? *AMBIO* 42(2): 160–173.
- Lazdinis, M., and P. Angelstam. 2005. Functionality of riparian forest ecotones in the context of former Soviet Union and Swedish forest management histories. *Forest Policy and Economics* 7(3): 321-332.

#### ***Helgeå catchment and Kristianstad Vattenrike (south Sweden)***

- Elbakidze, M., T. Hahn, V. Mauerhofer, P. Angelstam, and R. Axelsson. 2013. Legal framework for biosphere reserves as learning sites for sustainable development: a comparative analysis of Ukraine and Sweden. *AMBIO* 42(2): 174–187.
- Richnau, G., P. Angelstam, S. Valasiuk, L. Zahvoyska, R. Axelsson, M. Elbakidze, J. Farley, I. Jönsson et al. 2013. Multi-faceted value profiles of forest owner categories in South Sweden: the River Helge å catchment as a case study. *AMBIO* 42(2): 188–200.

#### ***Bialowieza forest (NE Poland)***

- Angelstam, P., and M. Dönz-Breuss. 2004. Measuring forest biodiversity at the stand scale – an evaluation of indicators in European forest history gradients. *Ecological Bulletins* 51: 305-332.
- Blicharska, M., and P. Angelstam. 2010. Conservation at risk: conflict analysis in the Bialowieza Forest, a European biodiversity hotspot. *International Journal of Biodiversity Science, Ecosystems Services & Management* 6(1): 68-74.
- Blicharska, M., P. Angelstam, H. Antonson, M. Elbakidze, and R. Axelsson. 2011. Road, forestry and regional planners' work for biodiversity conservation and public participation: a case study in Poland's hotspots regions. *Journal of Environmental Planning and Management* 54(10): 1373-1395.
- Edman, T., P. Angelstam, G. Mikusinski, J.-M. Roberge, and A. Sikora 2011. Spatial planning for biodiversity conservation: Assessment of forest landscapes' conservation value using umbrella species requirements in Poland. *Landscape and Urban Planning* 102: 16-23.
- Roberge, J.-M., and P. Angelstam. 2006. Indicator species among resident forest birds – a cross-regional evaluation in northern Europe. *Biological Conservation* 130: 134-147.
- Roberge, J.-M., P. Angelstam, and M.-A. Villard. 2008. Specialised woodpeckers and naturalness in hemiboreal forests - deriving quantitative targets for conservation planning. *Biological Conservation* 141: 997-1012.

### ***The Carpathian Mountains in Lviv region (W Ukraine)***

- Angelstam, P., and M. Elbakidze. 2006. Sustainable forest management in Europe's East and West: trajectories of development and the role of traditional knowledge. In: Parrotta, J., Agnoletti, M., Johan, E. (Eds.), *Cultural heritage and sustainable forest management: the role of traditional knowledge*. MCPFE Proceedings, part 2, 353-361.
- Angelstam, P., M. Elbakidze, R. Axelsson, P. Čupa, L. Halada, Z. Molnar, I. Patru-Stupariu, K. Perzanowski, et al. 2013. Maintaining cultural and natural biodiversity in the Carpathian Mountain ecoregion: need for an integrated landscape approach. In *Integrating nature and society towards sustainability*, ed. J. Kozak, K. Ostapowicz, A. Bytnerowicz, and B. Wyzga. Dordrecht: Springer. 10.1007/978-3-642-12725-0\_28.
- Elbakidze, M., and P. Angelstam. 2013. Sustainable forest management from policy to landscape, and back again: a case study in the Ukrainian Carpathian Mountains. In *Integrating nature and society towards sustainability*, ed. J. Kozak, K. Ostapowicz, A. Bytnerowicz, and B. Wyzga. Dordrecht: Springer. doi: 10.1007/978-3-642-12725-0\_23.
- Elbakidze, M., and P. Angelstam. 2007. Implementing sustainable forest management in Ukraine's Carpathian Mountains: the role of traditional village systems. *Forest Ecology and Management* 249: 28-38.
- Keeton, W.S., P. Angelstam, M. Baumflek, Y. Bihun, M. Chernyavskyy, S. M. Crow, A. Deyneka, M. Elbakidze, et al. 2013. Sustainable forest management alternatives for the Carpathian Mountain region, with a focus on Ukraine. In *Integrating nature and society towards sustainability*, ed. J. Kozak, K. Ostapowicz, A. Bytnerowicz, and B. Wyzga. Dordrecht: Springer. DOI: 10.1007/978-3-642-12725-0\_24.
- Törnblom, J., P. Angelstam, E. Degerman, L. Henrikson, T. Edman, and J. Temnerud. 2011. Catchment land cover as a proxy for macroinvertebrate assemblage structure in Carpathian Mountain streams. *Hydrobiologica* 673: 153–168.

### ***Roztochya Biosphere Reserve (W Ukraine)***

- Baumann, M., T. Kuemmerle, M. Elbakidze, M. Ozdogan, V.C. Radeloff, N. Keuler, A. Prishchepov, I. Kruhlov, et al. 2011. Patterns and drivers of post-socialist farmland abandonment in Western Ukraine. *Land Use Policy* 2: 552–562.
- Elbakidze, M., P. Angelstam, C. Sandström, N. Stryamets, S. Crow, R. Axelsson, G. Stryamets, and T. Yamelynets. 2013. Biosphere Reserves for conservation and development in Ukraine? Legal recognition and establishment of the Roztochya initiative. *Environmental Conservation*. doi: [10.1017/S0376892912000434](https://doi.org/10.1017/S0376892912000434).
- Elbakidze, M., T. Hahn, V. Mauerhofer, P. Angelstam, and R. Axelsson. 2013. Legal framework for biosphere reserves as learning sites for sustainable development: a comparative analysis of Ukraine and Sweden. *AMBIO* 42(2): 174–187.
- Stryamets, N., M. Elbakidze, and P. Angelstam. 2011. Role of non-wood forest products for local livelihoods in countries with transition or market economy: case studies in Ukraine and Sweden. *Scandinavian Journal of Forestry* 27(1): 74-87.

***Kovdozersky Model Forest (Murmansk oblast, NW Russia)***

- Elbakidze, M., P. Angelstam, and R. Axelsson. 2007. Developing sustainable forest management in North-West Russia: experiences from three implementation projects. - *Forest Facts* 3. Forest Research at the Swedish University of Agricultural Sciences. 4 pp.
- Elbakidze, M., P. Angelstam, and R. Axelsson. 2007. Sustainable forest management as an approach to regional development in the Russian Federation: state and trends in Kovdozersky Model Forest in the Barents region. *Scandinavian Journal of Forest Research* 22: 568-581.
- Elbakidze, M., P. Angelstam, P., and R. Axelsson. 2012. Stakeholder identification and analysis for adaptive governance in the Kovdozersky Model Forest, Russian Federation. *The Forestry Chronicle* 88 (3): 298-305.

***Priluzie Model Forest (Komi Republic, NW Russia)***

- Elbakidze, M., P. Angelstam, C. Sandström, and R. Axelsson. 2010. Multi-stakeholder collaboration in Russian and Swedish Model Forest initiatives: adaptive governance towards sustainable forest management? *Ecology and Society* 15(2): 14.
- Elbakidze, M., P. Angelstam, K. Andersson, M. Nordberg, and Yu. Pautov. 2011. How does forest certification contribute to boreal biodiversity conservation? Standards and outcomes in Sweden and NW Russia. *Forest Ecology and Management* 262: 1983-1995.
- Elbakidze, M., K. Andersson, P. Angelstam, G.W. Armstrong, R. Axelsson, F. Doyon, M. Hermansson, J. Jacobsson, et al. 2013. Sustained yield forestry in Sweden and Russia: how does it correspond to sustainable forest management policy? *AMBIO* 42(2): 160–173.

***Pskov Model Forest (Pskov oblasts, W Russia)***

- Angelstam, P., and M. Dönnz-Breuss. 2004. Measuring forest biodiversity at the stand scale – an evaluation of indicators in European forest history gradients. *Ecological Bulletins* 51: 305-332.
- Elbakidze, M., P. Angelstam, C. Sandström, and R. Axelsson. 2010. Multi-stakeholder collaboration in Russian and Swedish Model Forest initiatives: adaptive governance towards sustainable forest management? *Ecology and Society* 15(2): 14.
